# Supplementary material
Source: PubMed Central journal article supplement (PMC7645239)
Supplement: EMBR-21-e51264-s001.pdf [file EMBR-21-e51264-s001.pdf]

**Table of contents**

Appendix Figure S1: Page 2

Appendix Figure S2: Page 3

Appendix Figure S3: Page 5

Appendix Figure S4: Page 6



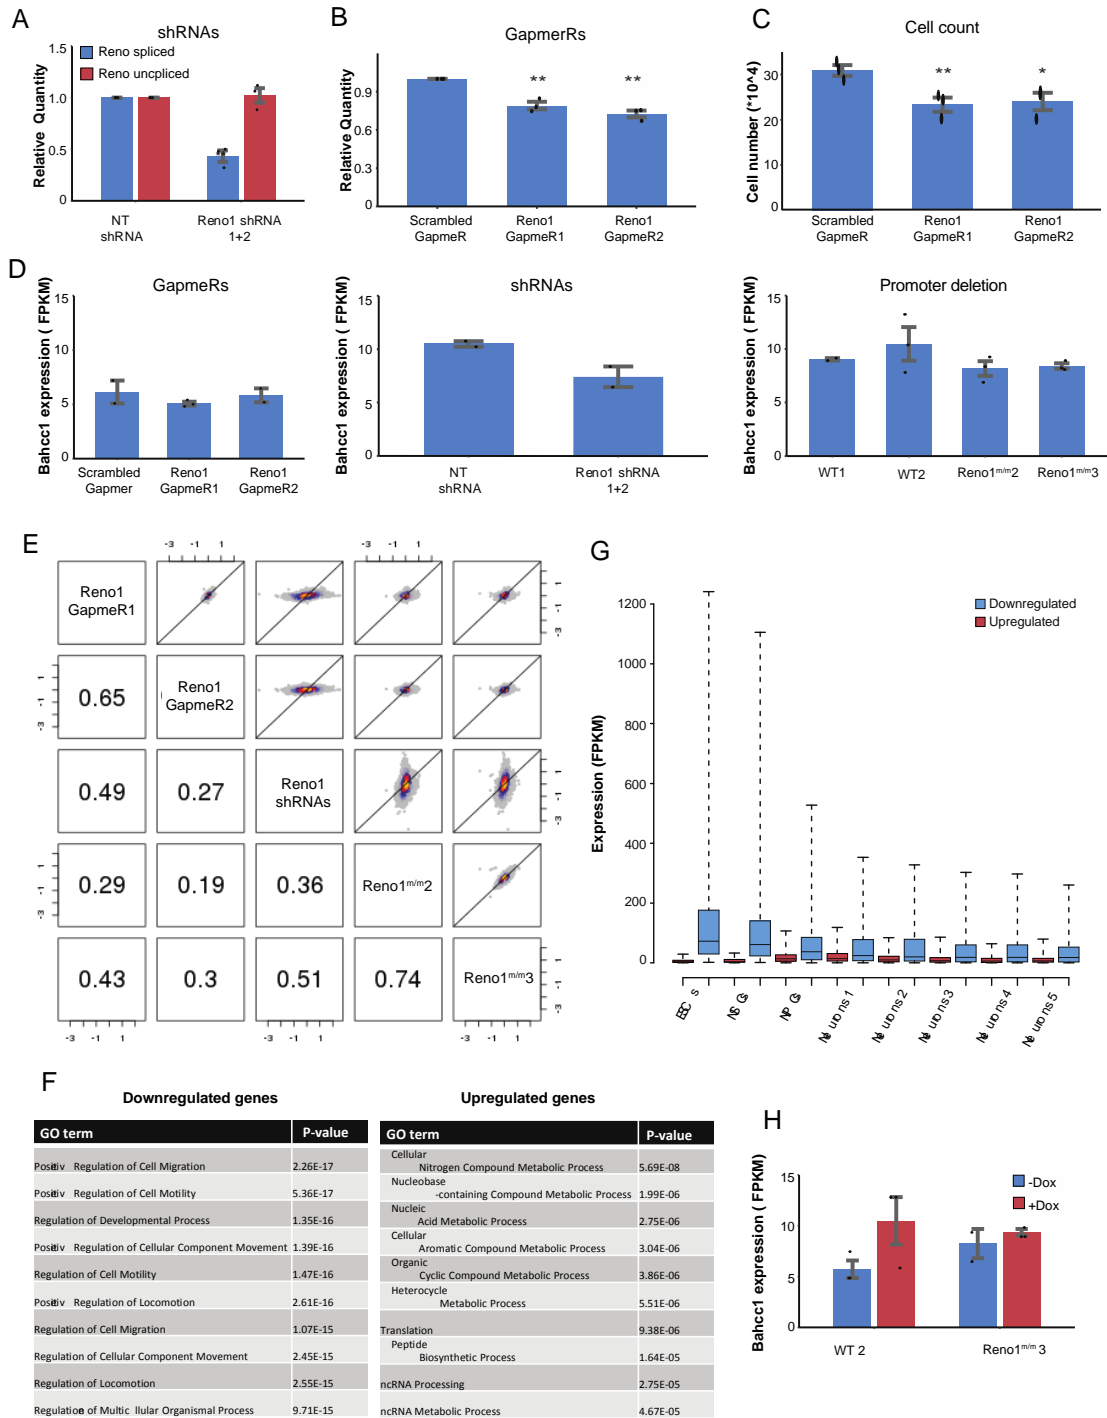

**Appendix Figure S2. Transcriptional response to *Reno1* depletion after two and four days of differentiation.** (A) qRT-PCR using the indicated primer pairs (see Methods) in cells at day 2 of differentiation following *Reno1* shRNA knockdown. Mean  $\pm$  SEM is shown for three independent experiments. \*\*,  $P < 0.01$  (unpaired two sample t-test). (B) qRT-PCR of *Reno1* in ES cells transfected with LNA GapmeRs targeting *Reno1* or a scrambled GapmeR that was used for normalization, at day 2 of

differentiation. Mean  $\pm$  SEM is shown for three independent experiments., \*  $P < 0.05$ , \*\*  $P < 0.01$  (unpaired two sample t-test). **(C)** Cell counts for cells transfected with LNA GapmeRs targeting *Reno1* or a scrambled GapmeR following four days of differentiation. Cells were harvested from one well of a 6-well plate, and counted using Orflo MOXI Z Mini Automated Cell Counter. Mean  $\pm$  SEM is shown for three independent experiments. \*  $P < 0.05$ , \*\*  $P < 0.01$  (unpaired two sample t-test). **(D)** Expression levels of *Bahcc1* mRNA, measured using RNAseq, in cells where *Reno1* was depleted using GapmeRs (left), shRNAs (middle) or promoter deletion (right). Mean  $\pm$  SEM is shown. The expression levels are not significantly different by DESeq2 analysis. **(E)** Pairwise scatterplots showing  $\log_2$ -transformed fold changes of cells with the indicated *Reno1* perturbation compared to their respective controls. Color indicates local point density. Numbers indicate Spearman correlation coefficient between the fold changes **(F)** Biological Process GO categories most enriched in genes significantly down- or upregulated in at least two *Reno1* perturbations, as identified using GOrilla (Eden et al, 2009). **(G)** Boxplots indicating the median, quartiles, and 5th and 95th percentiles of expression levels of genes which were significantly ( $P < 0.05$ ) downregulated (n=168) or upregulated (n=94) by at least two out of three *Reno1* perturbations at day 2 in fig. 5A, during the same neuronal differentiation time points described in Fig. 5C. **(H)** Expression levels of *Bahcc1* mRNA, measured using RNAseq, in WT and *Reno1<sup>m/m</sup>* cells following Dox addition. Mean  $\pm$  SEM is shown. \*\*  $P < 0.01$  (DESeq2).

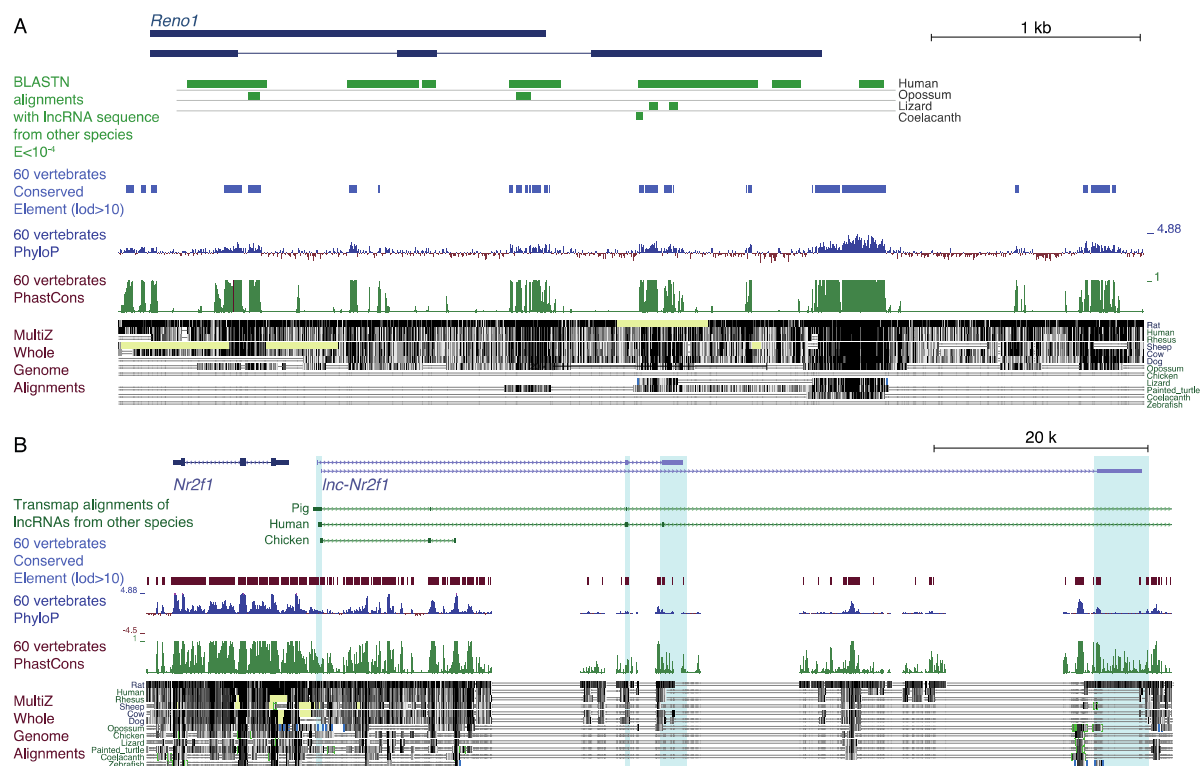

**Appendix Figure S3. Sequence conservation of *Reno1* and *Inc-Nr2f1*.** (A) *Reno1* lncRNA locus in human with the two isoforms show and with the regions alignable ( $E$ -value  $< 10^{-4}$ ) with lncRNAs from other species shown in Figure 3A, and conserved elements, conservation scores, and whole-genome alignments from the UCSC genome browser. (B) Transmap alignments of Ensembl transcripts from other species and genome conservation information from the UCSC genome browser for the *Inc-Nr2f1* lncRNA.

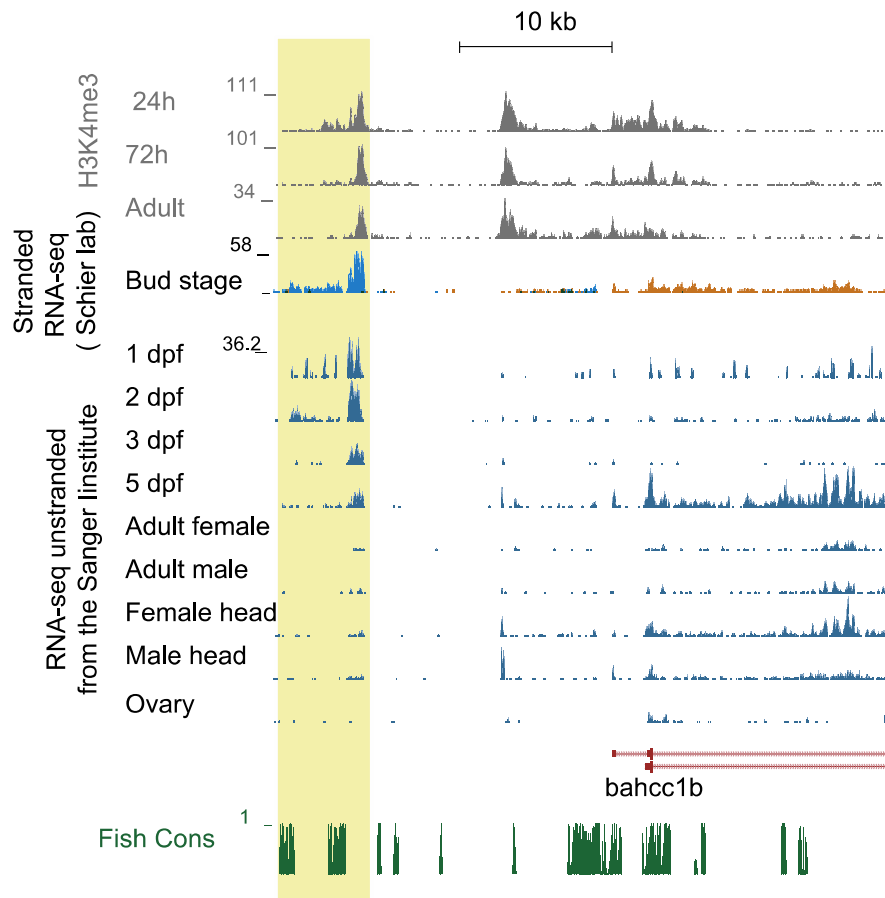

**Appendix Figure S4. Zebrafish *Ren1* locus.** H3K4me3 Chip-seq coverage from (Ulitsky et al, 2011), RNA-seq from (Howe et al, 2013; Pauli et al, 2012). Putative *Ren1* locus is shaded.
